# Supplementary material for: Visible light-induced charge injection and migration in self-assembled carbon dot-DNA-carbon dot nano-dumbbell obtained through controlled stoichiometric conjugation
Source: Royal Society of Chemistry journal article supplement (doi:10.1039/d1nr01689j), 2021-01-01
Supplement: d1nr01689j1.pdf [file d1nr01689j1.pdf]

# Visible Light-Induced Charge injection and migration in self-assembled Carbon Dot-DNA-Carbon Dot Nano-dumbbell obtained through controlled stoichiometric conjugation

Saptarshi Mandal, Prolay Das\*

*Department of Chemistry, Indian Institute of Technology Patna, India*

## Supplementary Information

### Materials

Desalted synthetic oligonucleotides (5'-PO<sub>4</sub><sup>2-</sup>-ATATGGATATGGATAT-3' and 5'-PO<sub>4</sub><sup>2-</sup>-ATATCCATATCCATAT-3') were purchased from Sigma-Aldrich custom oligo service. SYBR Gold was acquired from Invitrogen. 1,4-diaminoanthraquinone (1,4-DAAQ), acrylamide, N,N'-methylenebisacrylamide, ammonium persulfate, N,N,N',N'-tetramethylethylenediamine (TEMED), tetrabutylammonium hexafluorophosphate ([Bu<sub>4</sub>N]PF<sub>6</sub>), 1-(3-Dimethylaminopropyl)-3-ethylcarbodiimide hydrochloride (EDC.HCl) were obtained from TCI Chemicals India Pvt. Ltd. Urea, formamide, dimethylformamide (DMF), acetonitrile (ACN), 2-[4-(2-hydroxyethyl)piperazin-1-yl]ethanesulfonic acid (HEPES), sodium phosphate dibasic (Na<sub>2</sub>HPO<sub>4</sub>) and monobasic (NaH<sub>2</sub>PO<sub>4</sub>), tris-base, taurine, ethylenediaminetetraacetic acid, imidazole, potassium bromide were procured from Merck, India. Ultrapure water from Milli-Q was used as solvent unless specified.

### Estimation of amines on CD surface

Amine functional groups on the CD surface were estimated approximately through Ninhydrin assay. First, a standard curve of absorbance vs. concentration of -NH<sub>2</sub> functional groups was generated by performing a Ninhydrin assay of Glycine with known concentrations. Then the CD solution was reacted with Ninhydrin, and the absorbance was measured. The amount of surface -NH<sub>2</sub> groups was estimated from the following standard curve generated equation:

$Y = 948 \times 10^{-6} X$ , where Y is the absorbance value, and X is the -NH<sub>2</sub> concentration in nmol.

The concentration -NH<sub>2</sub> functional groups were calculated as 8 nmol/μL of CD stock solution. We diluted the stock CD solution with water to 0.8 nmol/μL for conjugation with the DNA strands.

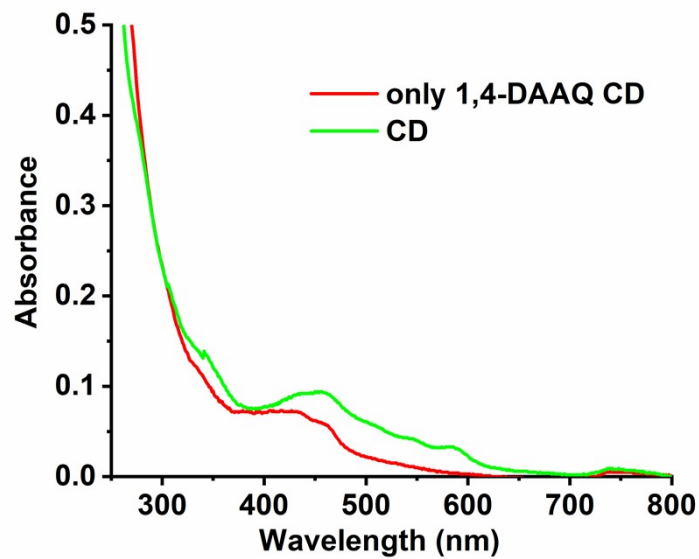

**Figure S1.** UV-Vis absorption spectra of only 1,4-DAAQ CD, and 1,4-DAAQ and glyoxal-based CD.

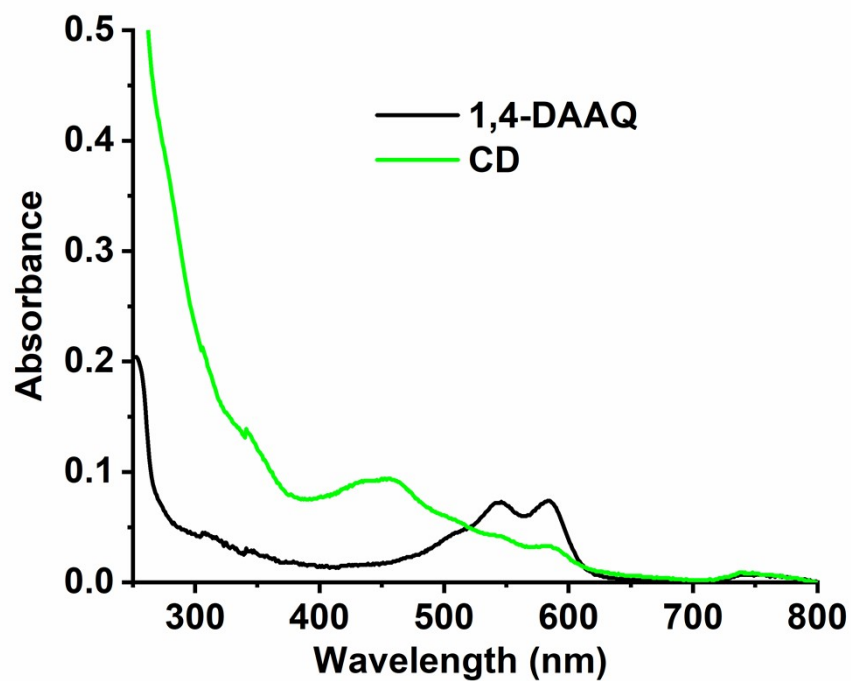

**Figure S2.** UV-vis absorption spectra of the CD and 1,4-DAAQ.

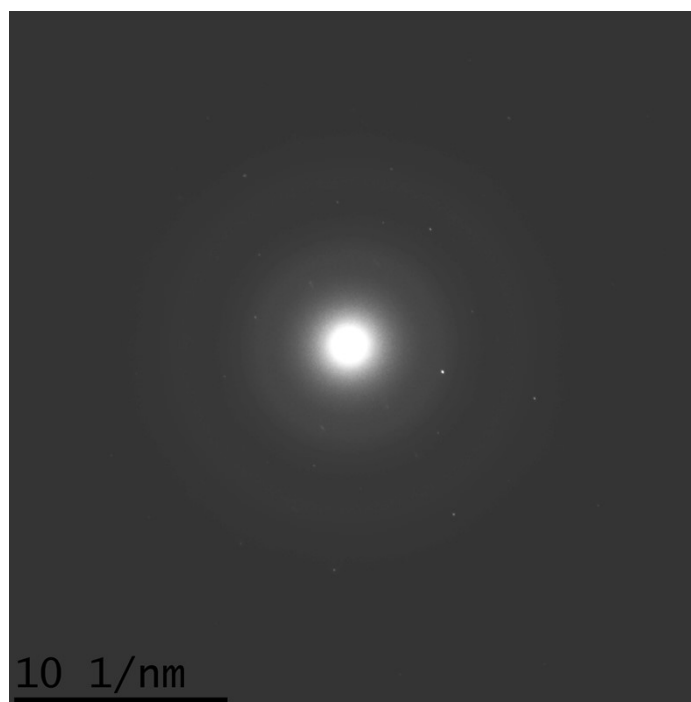

**Figure S3.** SAED pattern of the CD revealing amorphous or poor crystallinity of the CD.

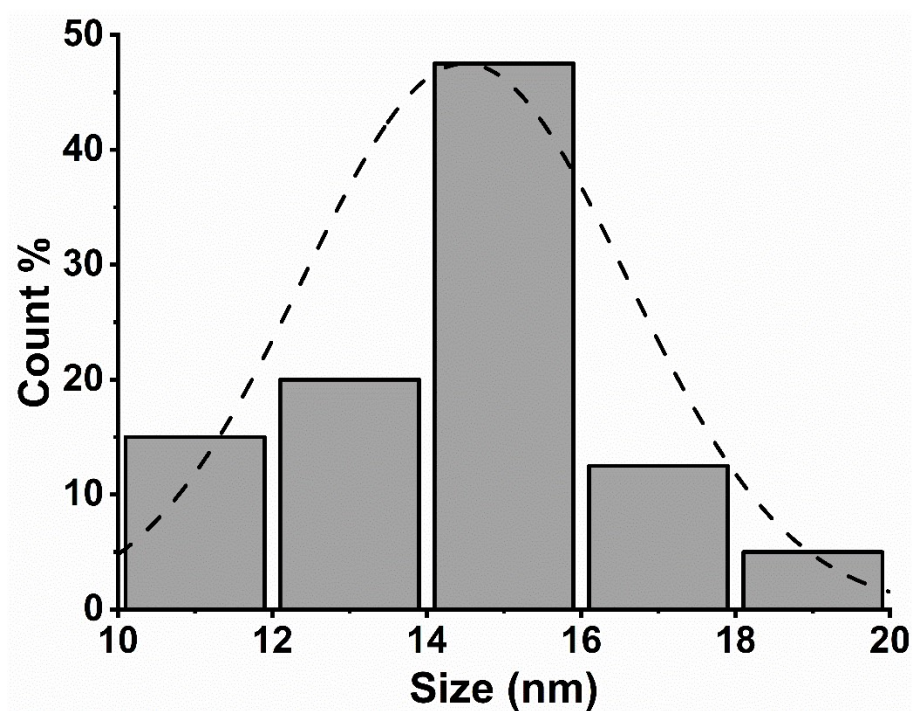

**Figure S4.** Size distribution of CD.

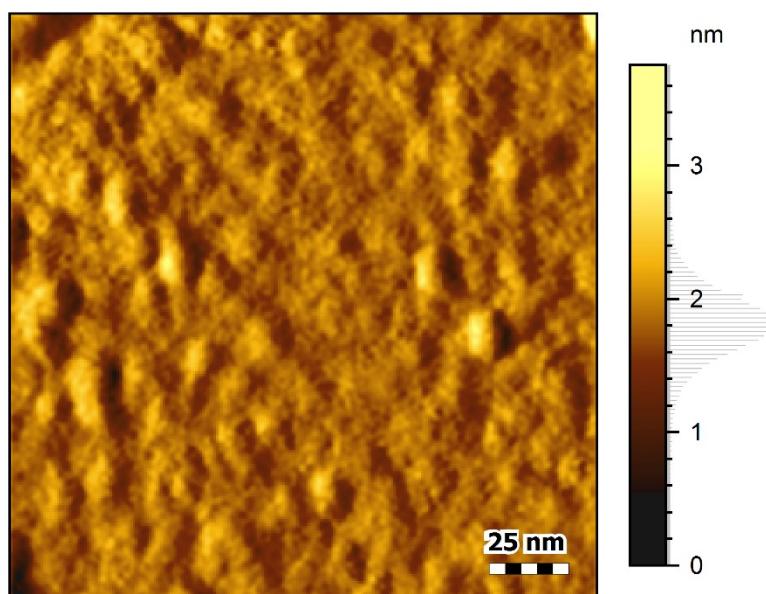

**Figure S5.** AFM image of the CD revealed a near-spherical shape.

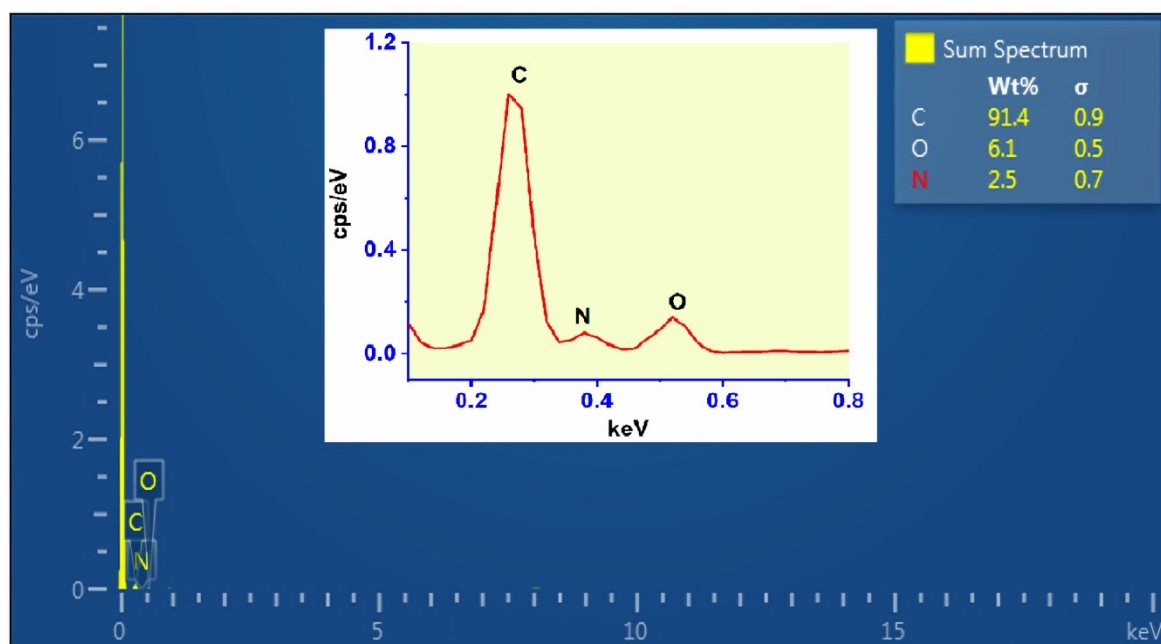

**Figure S6.** EDS spectra of the CD showing the presence of C, N, and O in the elemental composition of the CD.

**Table S1.** Elemental calculation of CD from EDS.

| Element | Line Type | k Factor | k Factor type | Absorption Correction | Wt%    | Wt% Sigma | Atomic % |
|---------|-----------|----------|---------------|-----------------------|--------|-----------|----------|
| C       | K series  | 3.115    | Theoretical   | 1.00                  | 91.43  | 0.88      | 93.17    |
| N       | K series  | 1.807    | Theoretical   | 1.00                  | 2.51   | 0.72      | 2.20     |
| O       | K series  | 1.455    | Theoretical   | 1.00                  | 6.06   | 0.55      | 4.64     |
| Total:  |           |          |               |                       | 100.00 |           | 100.00   |

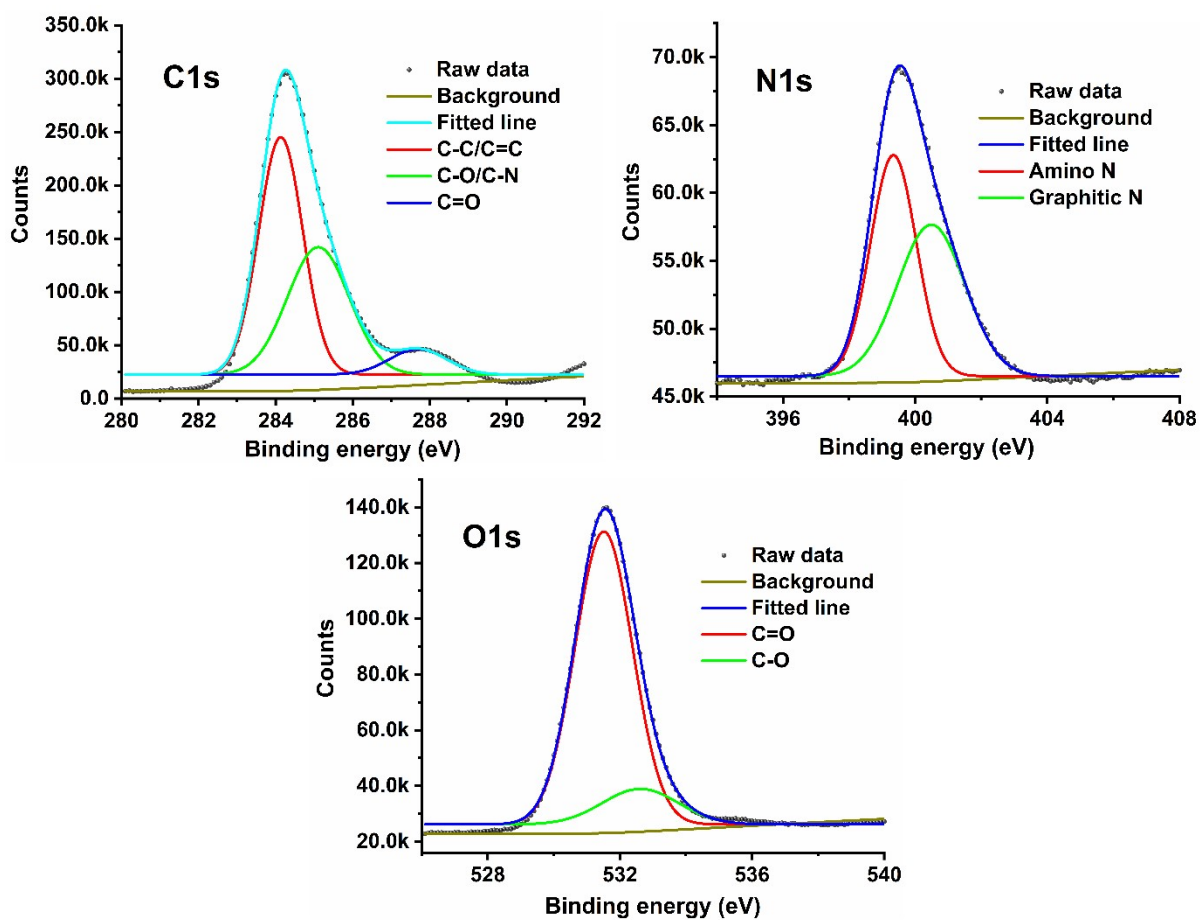

**Figure S7:** High resolution C1s, N1s and O1s XPS spectra of the CD.

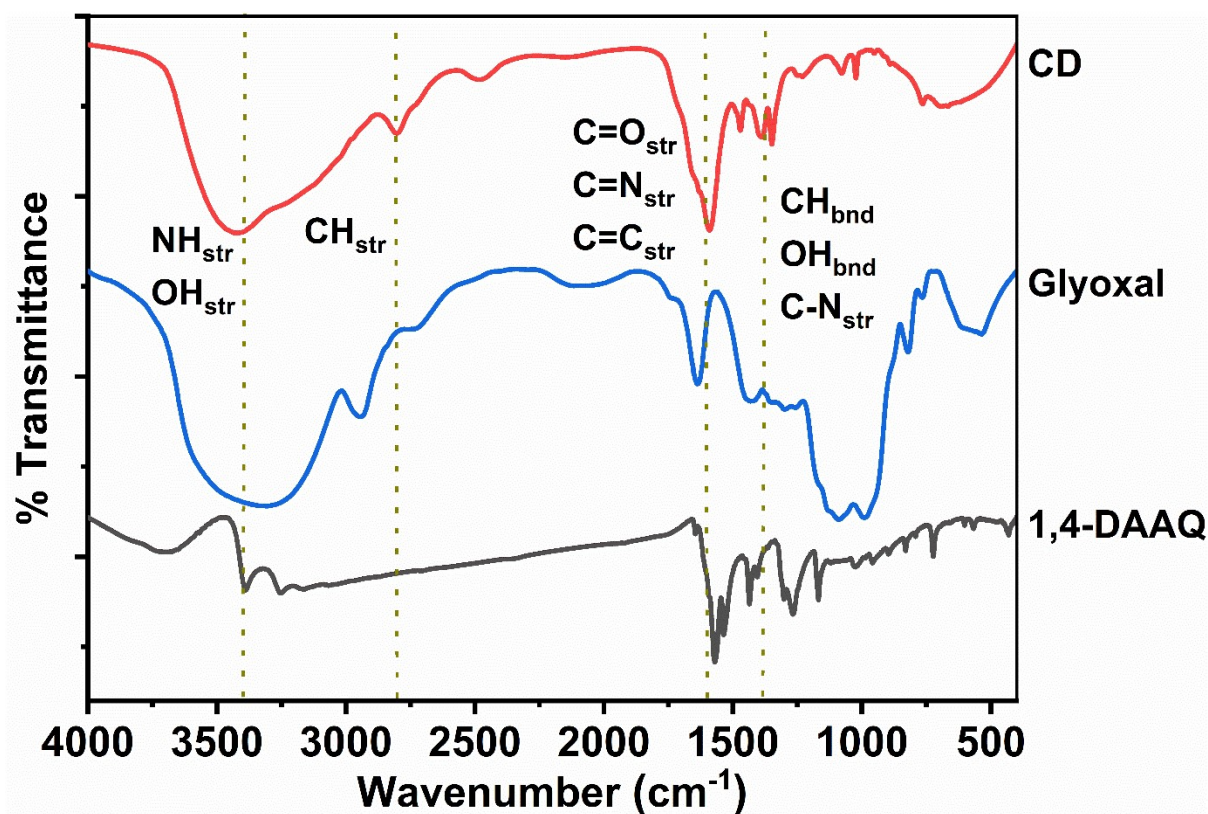

Figure S8. FTIR spectra of the CD along with the precursors 1,4-DAAQ and glyoxal. str: stretching, bnd: bending

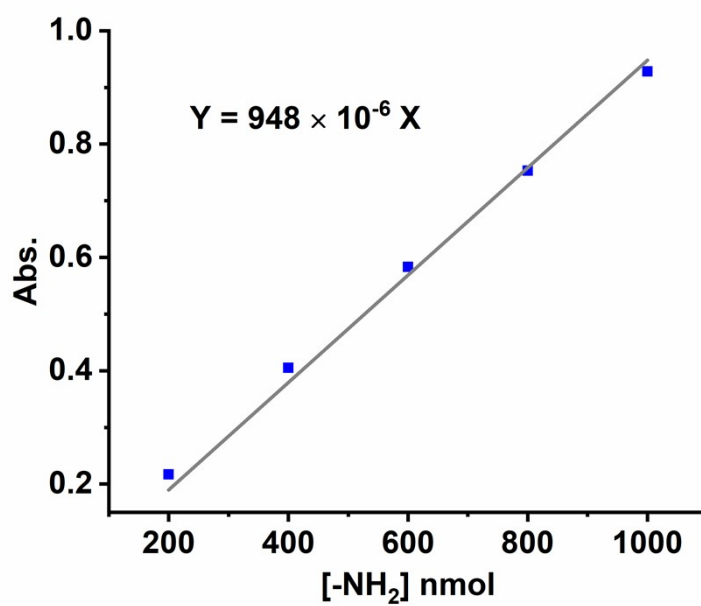

Figure S9. Ninhydrin assay standard curve.

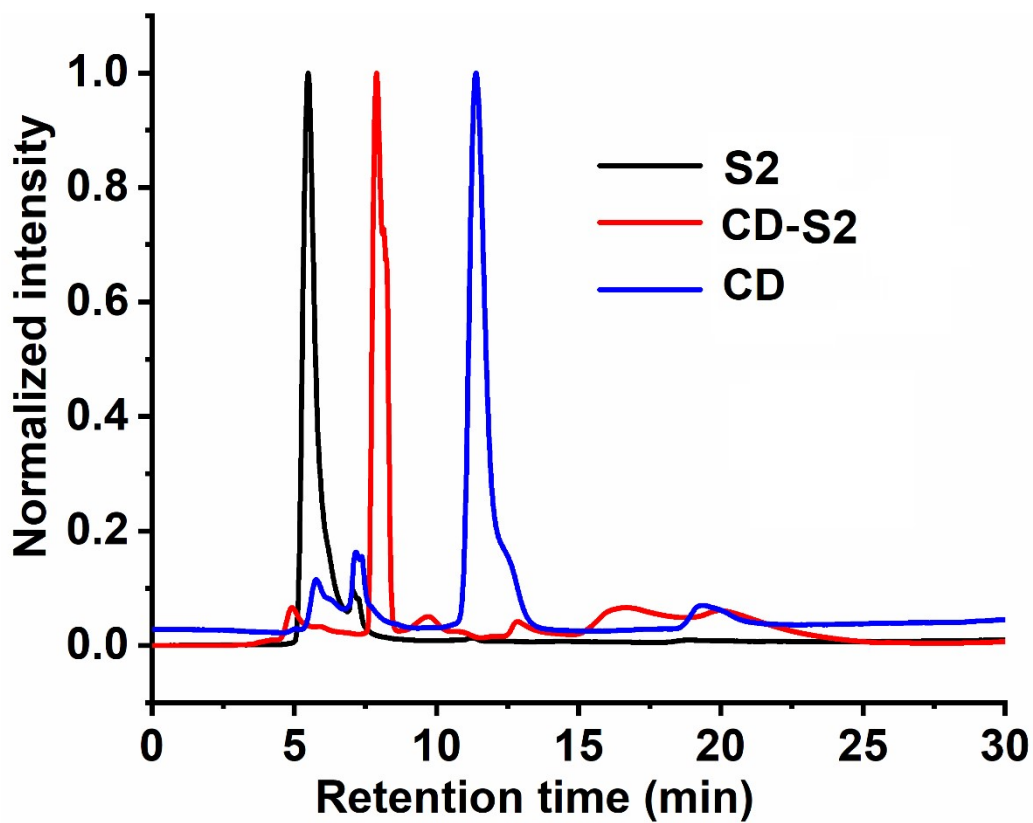

Figure S10. HPLC profile for CD-S2 conjugation.

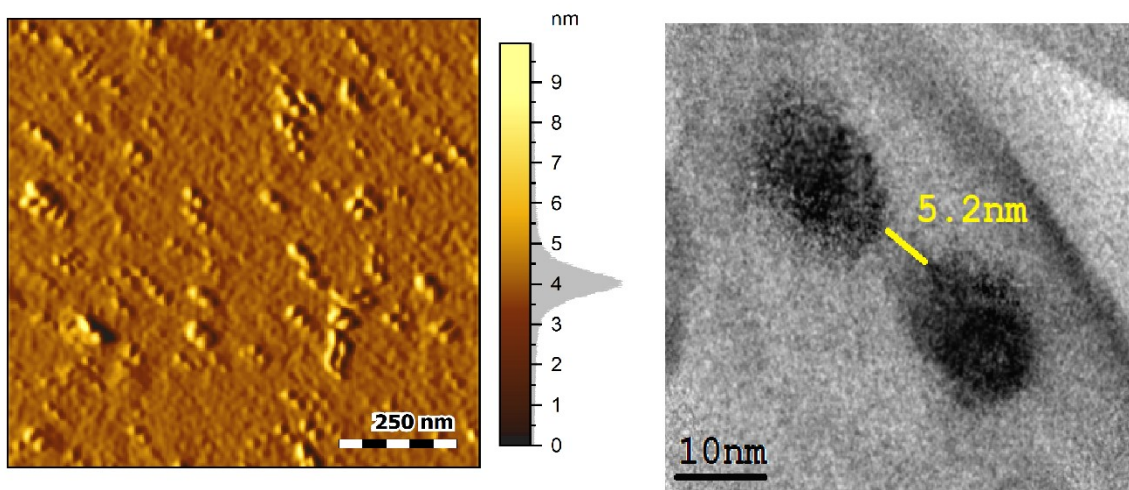

Figure S11. AFM and TEM images of the CD-S1-S2-CD dumbbell

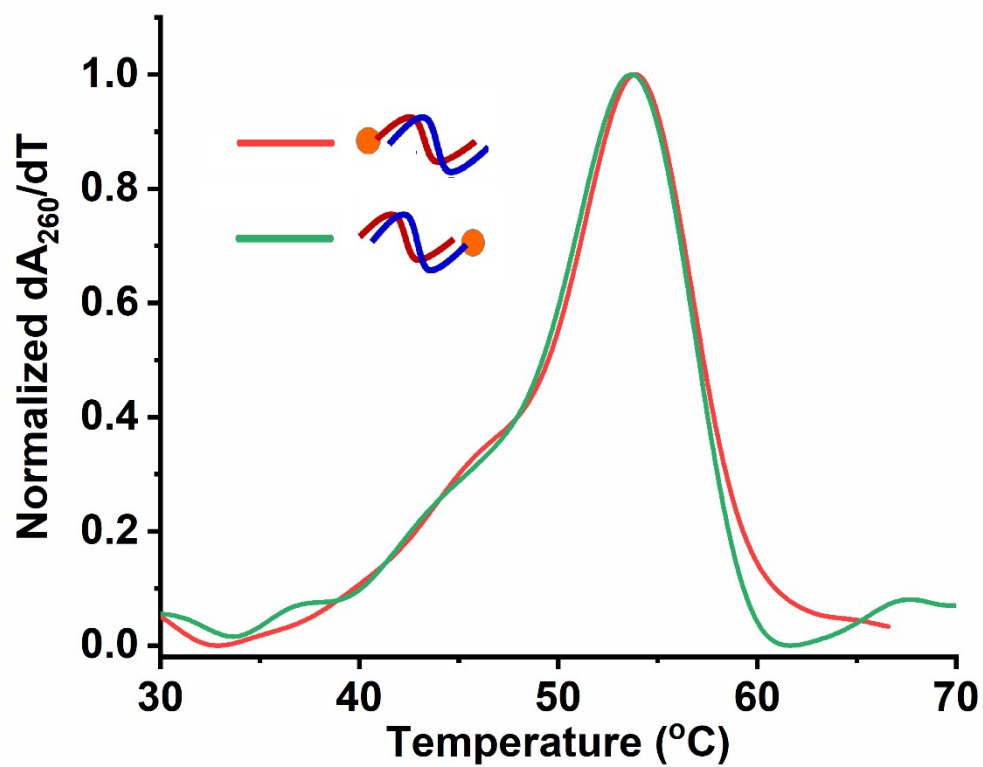

Figure S12. Thermal melting curves of CD-S1-S2 and S1-S2-CD.

Table S2.  $T_m$  value of DNA hybridized systems.

|                   |                                                                                     |                                                                                     |                                                                                      |                                                                                       |
|-------------------|-------------------------------------------------------------------------------------|-------------------------------------------------------------------------------------|--------------------------------------------------------------------------------------|---------------------------------------------------------------------------------------|
| Hybridized system | 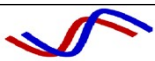 |  |  |  |
| $T_m$ value (°C)  | 54.5                                                                                | 53.9                                                                                | 53.8                                                                                 | 52.5                                                                                  |



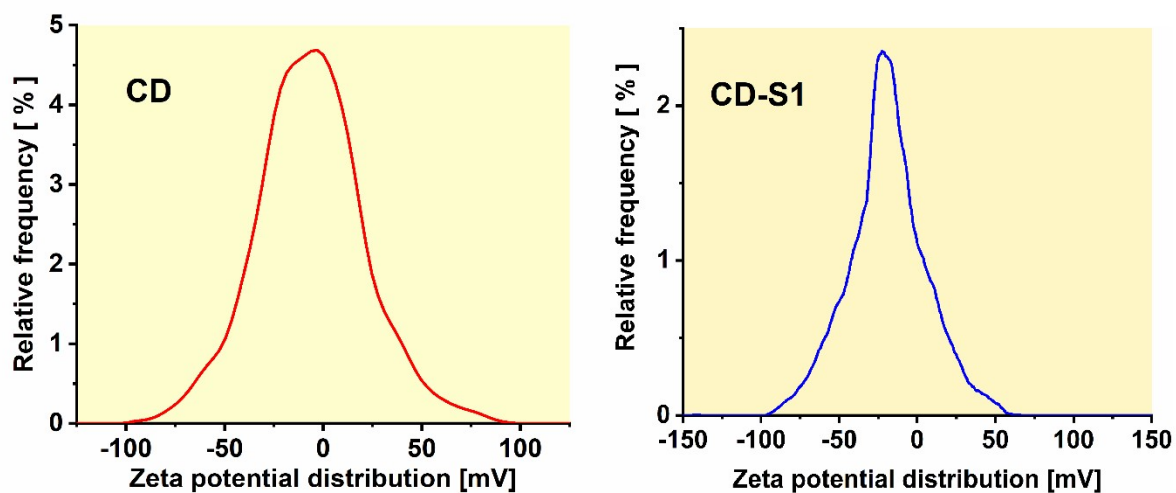

**Figure S13.** Zeta potential of the CD and CD-S1 conjugate, revealing a negative zeta potential for both the samples.

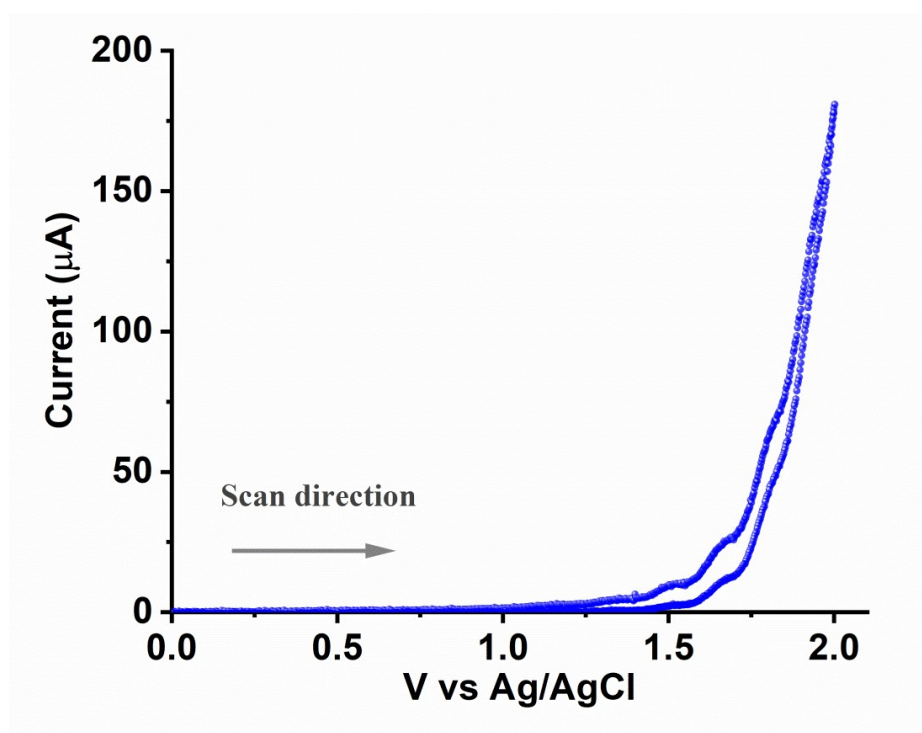

**Figure S14.** Cyclic voltammogram of the CD in acetonitrile at scan rate 30 mV/s.

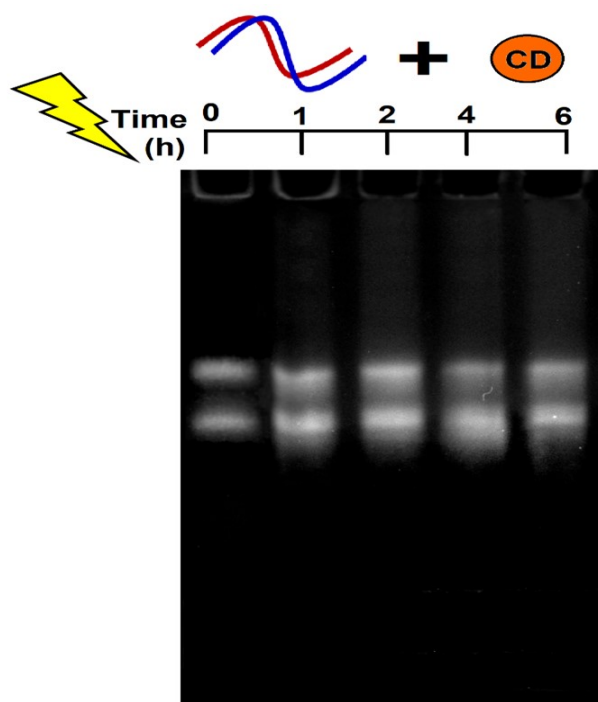

**Figure S15.** S1-S2 and CD physical mixture with varying irradiation time with 100W tungsten bulb.

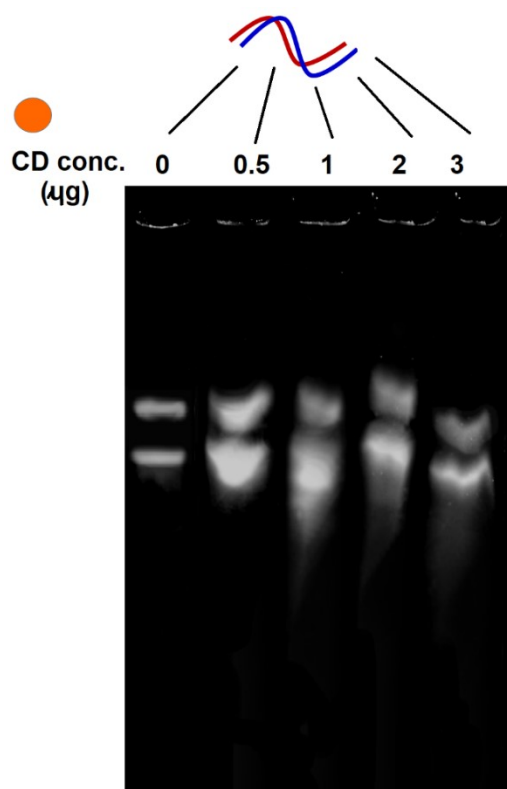

**Figure S16.** S1-S2 CD physical mixture with increasing CD concentration irradiated under 100W tungsten bulb.

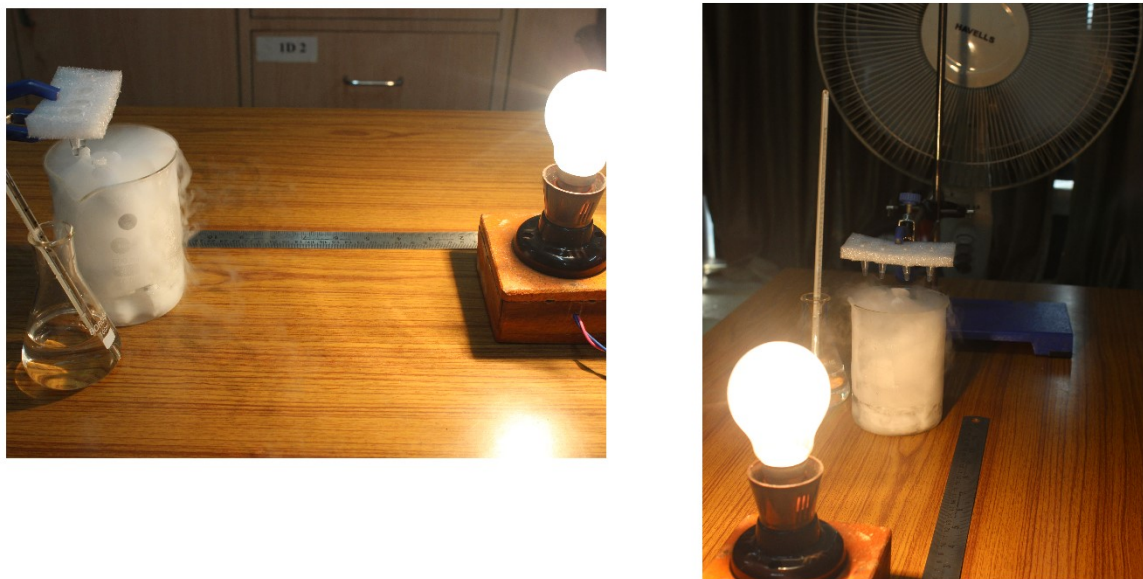

**Figure S17.** Experimental set up for irradiation of nano-assemblies with visible light from a tungsten source

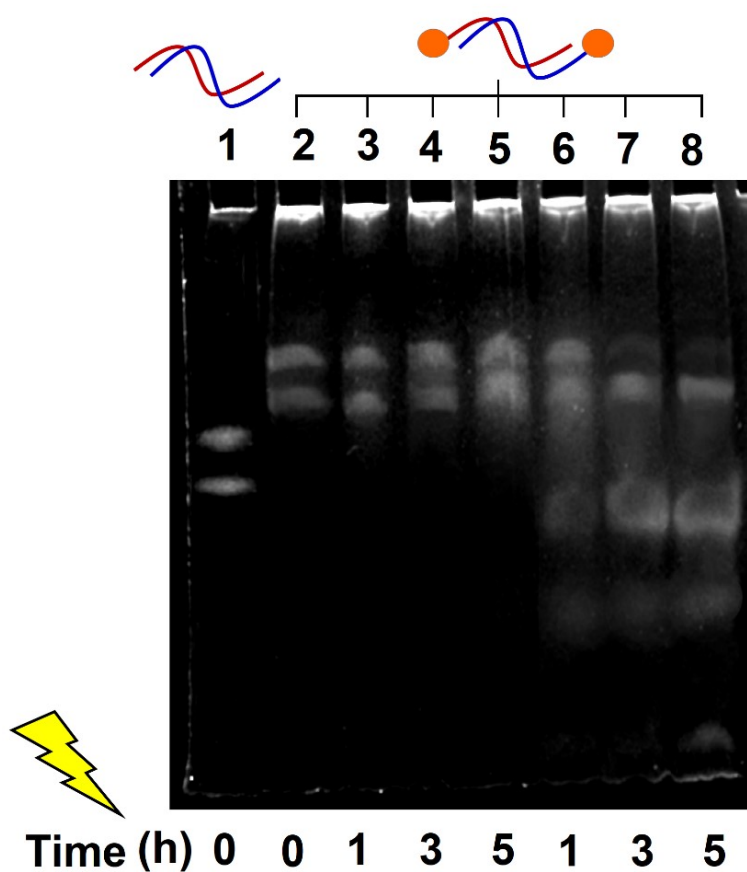

**Figure S18.** CD-DNA dumbbell systems with varying irradiation time under 28W white tube light and 100W tungsten bulb.

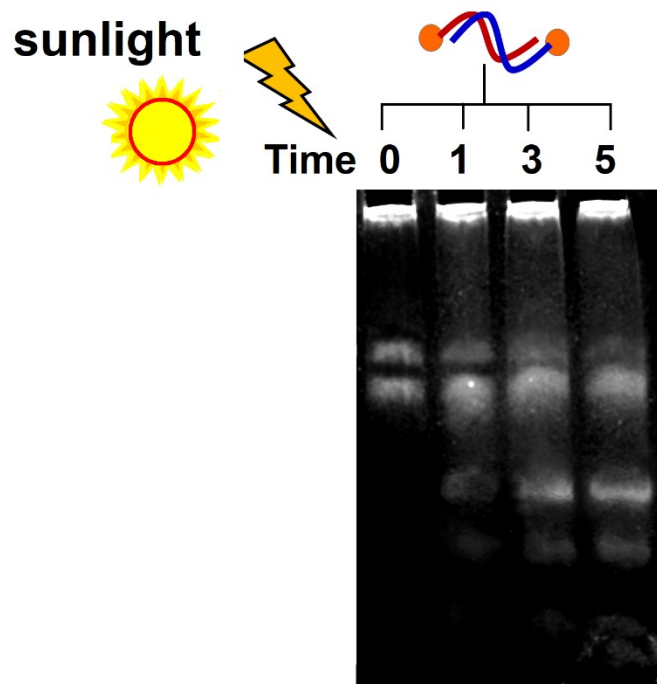

**Figure S19.** CD-S1-S2-CD strand connected CD hybridized DNA with varying irradiation time under natural sunlight 1 3 5 hours
